# Supplementary material
Source: publisher site journal article supplement (https://www.degruyterbrill.com/publication/isbn/9783839473344/downloadAsset/9783839473344_Leseprobe.pdf)
Supplement: Supplementary file 1 [file 9783839473344_Leseprobe.pdf]



Fatma Kargin, Dorothee King,  
Selena Savić (eds.)

# TEACHING ARTISTIC STRATEGIES

Playing with Materiality,  
Aesthetics and Ambiguity

# From:

*Fatma Kargin, Dorothée King, Selena Savić (eds.)*

## Teaching Artistic Strategies

### Playing with Materiality, Aesthetics and Ambiguity

August 2024, 162 p., pb., 7 col. ill.

46,00 € (DE), 978-3-8376-7334-0

E-Book: available as free open access publication

PDF: ISBN 978-3-8394-7334-4

Artistic strategies have a great transformative potential to improving research, teaching, and artistic expression. The contributors to this volume show how to unleash this potential by presenting a variety of epistemological experiments at the intersection of artistic research, pedagogy, and innovative practices in art and design education. The diversity of contributions demonstrates the non-exhaustive space for experimental phenomenological adventures. This collection strengthens new communities of educators and researchers in arts and design, whose practices are built on the concept of care as empathetic knowledge production.

**Fatma Kargin**, born in 1991, is a scholar of art education and cultural studies. Since 2018 she has been a PhD Candidate at the International Graduate Centre for the Study of Culture at Justus-Liebig-Universität Gießen. Currently she researches and teaches at the Institute Arts and Design Education at Hochschule für Gestaltung und Kunst Basel FHNW. Her research focuses on responsive phenomenology and transformative aesthetics.

**Dorothée King** (Ph.D.), born in 1979, is a professor of arts and design education and serves as the Head of the Institute of Arts and Design Education at Hochschule für Gestaltung und Kunst Basel FHNW. Before, she taught at the Rhode Island School of Design, the Transart Institute in NYC, and the Banff New Media Institute in Canada. Her research focuses on ephemerality and the histories of art schools. She also runs international workshops on digital storytelling.

**Selena Savić** is a trained architect and an assistant professor for the protohistory of Artificial Intelligence and machines in the arts at the University of Amsterdam. After completing her PhD at École Polytechnique Fédérale de Lausanne and an SNSF-funded postdoc at Technische Universität Wien, she worked at the Basel Academy of Art and Design FHNW as the Head of the Make/Sense PhD programme. Her research interests animate a practice at the intersection of computational processes and posthumanist and postcolonial critique of technology.

For further information:

[www.transcript-verlag.de/en/978-3-8376-7334-0](http://www.transcript-verlag.de/en/978-3-8376-7334-0)

© 2024 transcript Verlag, Bielefeld

# Contents

---

**Introduction – Teaching Artistic Strategies**  
Playing with Materiality, Aesthetics and Ambiguity  
*Introduction by Fatma Kargin, Dorothée King, Selena Savić* ..... 7

**Spontaneity and the Spaces Between**  
*Fatma Kargin* ..... 15

**ARCHIPEDAGOGY – Un-islanding Artistic Research and Its Education**  
*Glenn Loughran* ..... 31

**Writing Horizontally**  
What Teaching, Artistic Research and Epistemology Might Have in Common  
*Lennart Krauss*.....57

**Researching and Reshaping Human-thing Constellations**  
Neo-material Thinking as a Principle for Teaching in the Arts  
*Annemarie Hahn* .....75

**Imagining new ways of representing refugees – Teaching proposal**  
*Elsa Gomis* ..... 91

**Dichotomous Keys as Way of Seeing**  
Teaching Botany Out of Context and Other Ways of Questioning the Artistic  
in Artistic Research Strategies  
*Vanessa Graf*..... 113

**Opuntia's Ubiquity**

Learning Situatedness from Artists

*Thomas Laval* ..... 125

**Teaching More-than-human Invitation in Artistic Research and  
Pedagogy**

*Selena Savić* ..... 143

# Introduction – Teaching Artistic Strategies

## Playing with Materiality, Aesthetics and Ambiguity

---

*Introduction by Fatma Kargın, Dorothée King, Selena Savić*

The strategic development of artistic research, art education research, research creation, and practice-based research in art and design suggests that art and design can offer innovative modes of knowledge practices, with a focus on a reciprocal relationship between theory and practice. Numerous publications from the UK, The Netherlands, and the Nordic Countries have been debating legitimacy, specificity, strength, and weaknesses of research in these contexts since the 1990s, steered by the Bologna educational reform in Europe.<sup>1</sup> While teaching is an important aspect of academic training and experience, the transfer of doctoral research into teaching has not been extensively discussed. And yet, it is precisely in the moment of transfer to teaching that academic knowledge coming out of art- and design-based research contributes to public knowledge and to the institutional grounding of these practices. This is an important step to ensure the transfer of the research to the public, and to contribute back to the field.

In May 2022, a four-day symposium *Teaching Artistic Strategies* for research and teaching in arts and design institutions was held at the University for Arts and Design in Basel, Switzerland. The intense conference on practice and theory transfers in diverse research projects on PhD and post-PhD levels was held as a joint event of the Institutes for Arts and Design Education (IADE) and Institute Experimental Design and Media Cultures (IXDM). The organizers were in a positive way overwhelmed by the approval and thus the apparent need for young researchers to ex-

change information on the methods and reasons for the transfer of artistic, design-based and art education research into teaching contexts.

This interest is quite understandable when we look at the short history of putting artistic strategies, academic research, and pedagogy in the same box of interest. Artistic research developed as a way to follow the Bologna protocol of the BA, MA, and PhD trajectory to secure comparable attention and funding to the humanities or natural sciences. Artistic and design-oriented researchers always seemed to suffer from an inferiority or a form of comparison complex regarding the traditional academic disciplines. After two decades of borrowing research methods from other disciplines and mixing them with artistic and design-led approaches, current researchers are understandably still sometimes confused by the big buffet of possibilities on how to apply their diverse perspectives on knowledge production methods. More questions on how to transform or infuse arts and design practices with science and transfer knowledge into teaching arose than could be answered. Daring to invent your own modes of speculation might be the only possible artistic way, but it still needs to be justified in an academic context.<sup>2</sup> The speculation about and transformation of possible methods continues. As the Godfather of artistic research Julian Klein said: “The proximity to scientific strategies and practices lies in the “not-yet-knowing.”<sup>3</sup>

Art Education stands at a turn. Making a link to the adventuring method of French philosopher Jacques Rancière, the square between artwork, art educational method, educator, and audience is increasingly dissolving in favour of diverse, situational, and spontaneous processes of engagement.<sup>4</sup> The contributions to the Basel symposium reflect on those multiple angles approaches to art education may take nowadays.

With this book we intended to initiate a different trend of ‘knowing.’ Our intent is to share our knowledges, and to make teaching approaches accessible and discussable. We want to foster feelings of being less lost. We aim to activate a new generation and community of researchers who care for one another, but also care for the different subject matters circling towards inclusion rather than trying to find the correct new terms for their research.

The symposium *Teaching Artistic Strategies* showcased outstanding approaches to pedagogy that problematized the transfer of research into teaching. It initiated a systematic exchange between junior researchers and established scholars in the field. The program included keynote lectures by Elke Krasny, Glenn Loughran and Irene Posch, along with twelve workshops and presentations by doctoral candidates and junior scholars. Some of these presentations were the basis for contributions we present in this book.

The main questions participants of the symposium raised were aimed at the contribution to epistemology in the arts and inclusive contemporary pedagogical methods through diverse media settings. We proposed to focus on this challenge through experimental approaches characteristic of the research practices of the participants. With this volume we allow ourselves a renewed transfer of knowledge. By showcasing different approaches to pedagogy and problematizing the transfer of research into teaching, this volume aims to contribute to long-term prospects and sustainability of practice-based and education-oriented research in art and design institutions. The main question we posed ourselves is how can innovative research questions on and around art-, design-, and media-relevant topics be transferred into teaching as well as into new discussion-initiating textual forms?

The stimulating contributions by the international researchers in this publication all deal with diverse knowledge discourses, media diversity, and innovative methodic-methodological transfers. Contributions are short enough to make a point, yet long enough to give a glimpse into the variety of ways artistic and design can index knowledge practices. While bringing significant impulses to artistic and art education research-and-teaching settings, the diversity of the contributions simultaneously showcases the potential of multi- and trans-perspectivity in both discourses. The question of the artistic is conceived differently in the individual contributions. The concepts and views of materiality and aesthetics addressed by the authors complement, challenge, and enrich each other by highlighting their wide-ranging contextualization in each contribution. Specifically, the issue of ambiguity as the third focus of this edition strikes us here – as it should – in manifold ways. We see

the productive potential of ambiguity in the diverse points of access and approaches to art pedagogy/education and to artistic research. What seems to be ambiguous in the sense of *Mehrdeutig* are the meanings ascribed to materiality and aesthetics. One step further, we identify another level of ambiguity in the sense of *Mehrdeutig* / *Zweideutig*, which manifests itself in the methodic-methodological considerations. In a closer look, finally, we encounter another layer of ambiguity in the sense of *Ambig* entangled in the moments, spaces and settings of teaching and learning conceptualized by the authors. While, for instance, Kargin suggests in her article that the *spaces between* are ambiguous, Hahn relies on ambiguity with the premise that the entities only emerge from the process of *intra-action*. While a certain categorization between the contributions seems to be redundant, as they position themselves specifically and strategically at the intersection of entangled discourses, the topics and the focus of the research can be divided into two central themes: **Arts Education** and **Artistic Research**.

Pedagogy in arts and design contexts is a mysterious field. Often the so-called true fine arts and design disciplines look down on the pedagogy departments. Pedagogy might be mocked or even ironically ignored in arts and design schools as a space where ideas and experience of doing art gets rationalized so that it can be effectively shared. Granted, participatory learning processes are strenuous, hurtful, and confrontational – but also rewarding. Knowledge transfer and learning how to produce and spread knowledge might be the most sustainable artistic practice there is. The articles in this edition focusing on **Art Education** revolve around events, whereas the understanding of the event spans from its explicit views as in the ‘event-based learning in artistic research processes’ to the ‘learning as an event itself’ with a phenomenological approach. In a more subtle way, we come across an event in the form of a shift as in the case of ‘horizontal writing’ and encounter it again in its temporally extended nature in the form of an ‘observation of one’s own situatedness and placement within diverse human-thing constellations.’ Situated within the discourse of archipelagic thinking, phenomenology, performativity, epistemology and neo-materialist approaches, the articles ask for spacious mindsets and different approaches to epistemology



through artistic, empirical and theory-based research methods revolving around aesthetics, ambiguity and materiality.

In individual contributions, art pedagogy and artistic research become tools of reflection through opening up to possibilities of responding to as well as designing the urgencies of our moment. Artistic research shall be understood as a transitory process of societal creativity, of imaginary agency, and cyclic modes of design. Importance is enhanced in questions of ownership, new forms of documentation, and anticipating future forms of knowledge.

**Fatma Kargın** raises in her chapter **Spontaneity and the Spaces Between** the question about spatial, time-related, and educational localization of learning in the museum, based on her ongoing empirical research on the modes of spectatorship and aesthetic experience. Kargın negotiates the intersections of performative spaces, learning, *Bildung*, spontaneity, and responsive phenomenology. She identifies such spaces as performative and therefore transitory and constantly mutating, coming up with the thesis that learning shall be considered as an event.

In his chapter **Glenn Loughran** explores **ARCHIPEDAGOGY – Un-islanding Artistic Research and Its Education** how the concept of the archipelago and archipelagic thinking can be used as a theoretical framework to support event-based artistic research processes. Loughran offers an original account of teaching experiences that stem out of a research project *What is an Island* which he led between 2018 and 2021 on Sherkin Island, Ireland. Highly relevant to the volume, this contribution connects anti-colonial philosophy and theory with art pedagogy in meaningful and insightful ways. Loughran looks into methods for translating those thinking processes into pedagogies of care and attention. The desire to ‘un-island’ knowledges and artistic practices demands new open communities ready for transdisciplinary experimental actions.

**Lennart Krauss’** chapter **Writing Horizontally – What Teaching, Artistic Research and Epistemology Might Have in Common** asks for shifts in research, epistemology, and education through new ways of integrating essayistic writing into educational artistic settings. Krauss’ take on teaching as trying things out puts a special focus on the mean-

ing and methods of working with writing, namely the format of the essay. This argument, partly rooted in etymology, is explored historically and practically. Krauss aims to turn a vertical learning process into a horizontal one by twisting authorship through the implementation of interstices and transgressions with switching modes of “thinking of” and “thinking about” to “thinking with” and “thinking through”.

In her chapter **Researching and Reshaping Human-thing Constellations – Neo-material Thinking as a Principle for Teaching in the Arts**, Annemarie Hahn proposes an art educational teaching sequence in which the idea is to observe one’s own placement within different human-human and human-thing constellations in order to better understand how we act and interact, include, and exclude. Relying on new materialist theory and object-oriented ontology, Hahn documents a teaching scenario which explored participants’ understanding and experience of inclusion in the context of the digital. She not only considers the conditions of human actors but also pays attention to material and spatial and media-related conditions that determine collective agency. The chapter thus addresses a very timely question, namely the relation between digital culture and inclusion.

Elsa Gomis’ chapter **Imagining New Ways of Representing Refugees** explores ways to bring awareness to the influence of the dominant Western media gaze on migration and refugee crises. In her teaching materials and the participatory pedagogical setting, Gomis carefully works to deconstruct the politically charged representation of migration in mainstream media through different artistic practices such as sketching, drawing and mapping. She uses those newly created images as a starting point to seek alternative means to visually portray contemporary migrants to challenge today’s ‘aesthetic of the we’.

Vanessa Graf’s chapter **Dichotomous Keys as a Way of Seeing: Teaching Botany Out of Context and Other Ways of Questioning the Artistic in Artistic Research Strategies** discusses how to bring together artistic and *artistic-scientific research*. Graf analyses the scientific method of ID-keying used in biology and botany as a practice that could be transformed in an art-related educational setting. Graf’s intention is to blur disciplinary boundaries and methodical divides, to enable a mean-

ingful contribution to a wider scientific discussion on how knowledge is constituted, created, and established.

**Thomas Laval's** chapter **Opuntia's Ubiquity: Learning Situatedness from Artists** analyses situatedness of knowledge comparing the ways in which two contemporary artists, Fareed Armaly and Mariana Castillo Deball, work with the same plant: the opuntia. In each artistic project, this cactus is discussed as a representation of a specific geographical and cultural territory. The question Thomas Laval is aiming for in his pedagogical approach is how to invite a terrestrial plant into the artistic practice without being confined to a utilitarian role.

In her chapter **Teaching More-than-human Invitation in Artistic Research and Pedagogy**, **Selena Savić** addresses three examples (imaginary of Plato's symposium, Joseph Beuys' performance *How to explain pictures to a dead hare*, a fishing wharf off the Atlantic coast of Canada) to ask questions of inclusion, authorship, environmental destruction, and human-centeredness with methods of posthumanism and feminist new materialism. Her focus is on notions of invitations and hospitality with the goal to find more inclusive forms of artistic pedagogy.

The contributions to *Teaching Artistic Strategies: Playing with Materiality, Aesthetics and Ambiguity* engage our readers into a variety of epistemological experiments with the aim to divide the borders between perception and production of arts and media. The diversity of contributions is a strength of this volume as it demonstrates the inexhaustive plurality and space of coexistence for the approaches taken by the authors.

With this compilation we hope to strengthen new communities of educators and researchers in arts and design, whose practices are built on the concept of care as empathetic knowledge production. We seek to contribute to new modes of phenomenological adventures in art-led research and didactics. The collection opens a space for discourse on art pedagogy, artistic research and practice-based research in art and design which hopes to contribute to broader concerns in higher education institutions.

## Notes

- 1 Without compiling a comprehensive list of books, the following will offer an overview: Christopher Frayling, *Research in Art and Design* (London: Royal College of Art, 1993); Mika Hannula, Juha Suoranta, and Tere Vadén, *Artistic Research: Theories, Methods and Practices* (Helsinki: Gothenburg, Sweden: Academy of Fine Arts; University of Gothenburg/Art Monitor, 2005); Estelle Barrett and Barbara Bolt, eds., *Practice as Research: Approaches to Creative Arts Enquiry*, Paperback ed (London: Tauris, 2010); Henk Borgdorff, *The Conflict of the Faculties: Perspectives on Artistic Research and Academia* (Amsterdam: Leiden University Press, 2012); Celia Lury and Nina Wakeford, eds., *Inventive Methods: The Happening of the Social*, Culture, Economy, and the Social (London; New York: Routledge, 2012).
- 2 Tröndle, Martin & Warmers, Julia: *Artistic research as aesthetic science. Contributions to a transdisciplinary hybridization of science and art*; Bielefeld. 2012
- 3 Klein, Julia: "Was ist künstlerische Forschung?" In: *kunsttexte.de/ Auditive Perspektiven*, No. 2., 2011.
- 4 Jacques Rancière: "The Emancipated Spectator". In: *Artforum*. Vol. 45, 2007, edition 7, pp. 271–281, 279.

## Spontaneity and the Spaces Between

---

Fatma Kargin

When considered in terms of museum(s), where does ‘learning’ really take place? In a workshop or a seminar room during a mediation offer, or in the halls and galleries of a museum with a guided tour? Or, simply, in none of these spaces? The question of space and learning is a result of my ongoing empirical research in which the spectators of an installation artwork in an exhibition room in Denmark are spontaneously asked to think aloud and film the entire process of spectatorship with a GoPro action camera. Based on the filmed *processes* that are recorded through the perspective of the spectators, research reconstructs the gaze, movement, and the constructed narratives in relation to responsivity, performativity, and materiality, and thus theorizes various styles of spectatorship. With an explorative search for the space(s) of learning, this article can also be read as a negotiation or theorization of such spaces situated at the intersection of theoretical positions between space, learning, *Bildung*, and responsive phenomenology.

For such an explorative search, the article assumes that learning in the context of museums – or even in an academic context – can be considered an event (*Ereignis*). Events, as Alva Noë argues, are “creatures of time. They are temporally extended in nature. They are never whole. At the beginning, they have not yet achieved a conclusion. At the end, their beginning is done with.”<sup>1</sup> Noë further concludes that the “past and the future are not present [in events], but they are implicated by them.”<sup>2</sup> In a similar manner, Bernhard Waldenfels argues that what happens ‘here and now’ constitutes the ‘not-yet’ and ‘not-anymore’,<sup>3</sup> and therefore points to the temporally extended nature of events. Furthermore, events

have a space-time constituting effect<sup>4</sup> and are results of continuous interlinking (*Anknüpfung*) and taking up of something.

Similarly, the 'learning' I refer to in this article can be understood as a playful interlinking, always at the floating intersection of movement (also as thinking), deviation, escalation, rejection, acceptance, or challenge. Constantly from one event into another, building on what is there, changing not only the *knowledge*, but also the way in which the manner of acquiring knowledge constantly deviates and shifts. Learning,<sup>5</sup> as Käte Meyer-Drawe argues, can also be understood as an execution (*Vollzug*) and an activity;<sup>6</sup> learning, she further concludes, always signifies the history [history of socialization] of the learners, as well as their divergent and conflictual process of change.<sup>7</sup> In such an execution / activity, Meyer-Drawe ascribes an 'awakening' character to learning, whereas the learning describes a 'beginning' but by no means a 'completion'.<sup>8</sup> The metaphor of 'awakening as learning' can further be understood as a transition and/or a response which do not rely or are not based on the initiative of individuals.<sup>9</sup> – Such a response is always eventful. – In her concept of learning, Meyer-Drawe also differentiates between 'learning, unlearning and relearning', whereas the 'relearning' (*Umlernen*) describes something which not only happens in 'experience', but takes place 'as experience'.<sup>10</sup> Such a relearning which equates an awakening always starts with an affect (*Widerfahrnis*) which comes from somewhere else, from others.<sup>11</sup>

Parallel to the 'awakening' character, learning can be thought of as a (responsive) event, which, in itself is eventful and event-like. By being an event, and therefore having these qualities, learning, I suggest, brings forth its own temporality and spatiality. That is to say, it brings forth and claims its own space as an event. In comparing learning to an *event* and pointing out its eventfulness and event-like quality, this article lays emphasis on its space and spatiality. Such a space, I suggest, can be understood in terms of a performative space in which an event/ a performance takes place. As Erika Fischer-Lichte argues in the context of theater and performance studies, a performative space neither pre-dates a performance, nor represents a construct;<sup>12</sup> but, it is brought forth through the performance itself. On the assumption that this argument also applies to

*learning as an event*, I explore, first, the conditions of emergence and functions of performative spaces, and renegotiate them in terms of spaces of learning. With a phenomenological approach, I sketch out a *space between* that equally relies on the inevitability of responding and a request which comes from somewhere else/the Other à la Waldenfels.

## I Performative spaces

As the text suggests that *learning as an event* takes place in performative spaces, I first discuss briefly the conditions of emergence and the modality of such spaces in relation to the co-presence of bodies. Performative spaces, as Fischer-Lichte defines them, refers to all spaces in which a performance takes place. Such spaces, usually theatres, open “special possibilities for the relationship between actors and spectators and for the movement and perception. Whatever the ways in which these possibilities are used, applied, realized, treated, or, alternatively, subverted, they affect the performative space.”<sup>13</sup> They also need to be distinguished from architectural-geometric spaces<sup>14</sup> in which a performance takes place. Fischer-Lichte compares these places, to a certain extent, to containers; as they pre-date and contain the performance/event and continue to exist long after the performance.<sup>15</sup> While the spatiality of such “containers” is, for instance, given, the spatiality of performative spaces is brought forth anew by the performance.<sup>16</sup>

This kind of spatiality can be compared to the spatiality of the body, insofar as the body’s spatiality changes, and therefore does not represent a fixed point in space. Merleau-Ponty notes that the body’s spatiality resembles much more a *situational spatiality*,<sup>17</sup> than a positional one. A situational spatiality indicates that, for instance, words such “here”, “under,” and “on” anchor the active body<sup>18</sup> / phenomenal body in an object and space, and do not refer to a determinate position and place in space. A body’s spatiality, for instance, is brought forth through movement,<sup>19</sup> and it contributes to generating the spatiality of performative spaces. Furthermore, the spatiality of performative spaces is marked as ‘unstable and fluctuating,’ as they transform and mutate with every movement

of the actors and spectators, and with spatial arrangements.<sup>20</sup> That is to say that bodies play a significant role in bringing forth the spatiality of performative spaces. If thought within the discourse of the sociology of space and in relation to bodies, Martina Loew makes a pointed and parallel argument on the construction of social space (*Sozialraum*)<sup>21</sup> and argues with Bourdieu that such a space is a social structure (*Gefüge*) which is brought forth through the movements/actions<sup>22</sup>, and therefore does not pre-exist.

Similarly, in the context of stage (*Bühne*), Waldenfels notes that it is a space in which something occurs, something takes place<sup>23</sup>. It is, particularly, a 'space in becoming'; such a space does not pre-exist, but it paves its own way, along with its spatiality and temporality during the performance.<sup>24</sup> He further explicates that such a space does not represent a mere construct, rather, it functions as an instance of orientation and anchoring in experience.<sup>25</sup> In a similar argument, Fischer-Lichte, too, indicates that spatiality is transitory and fleeting,<sup>26</sup> and argues that the performative space, unlike architectural-geometric space, does not represent a construct or a work of art, and that its performativity needs to be attributed to events.<sup>27</sup>

For generating the performativity of space, and with regard to spatiality, Fischer-Lichte introduces three strategies:

"first, the use of an (almost) empty space or one with variable arrangements allowing for the unrestricted movement of actors and spectators; second, the creation of spatial arrangements enabling so far unexplored possibilities for the negotiation of relationships between actors and spectators, movement and perception; and third, the experimentation with given spaces usually fulfilling other purposes."<sup>28</sup>

Especially with the third strategy she emphasizes that this bears the potential to "blend real and imagined spaces [and thus] defines the performative space as a 'space between.'"<sup>29</sup> Such a 'space between', if thought again in terms of Loew, not only comprise the real ones, but also the imagined ones.<sup>30</sup> The theory of spaces between pertains primarily to theatre and performance studies. However, I suggest that it can be extended



to any space in which bodies co-exist, perform, act, engage, and simply, occupy that space with various purposes. Within this experimental negotiation I will focus on museums and sketch out a space between which not only results from the experimentation of given spaces, but one that can also be brought forth through experimental approaches in a broader sense.

## II Spaces between

To further conceptualize performative spaces as 'spaces between', I suggest broadening and negotiating this concept and its emergence in relation to presence, presentness and mood. Performative spaces as spaces between offer the possibility of blending the *real* and the *imagined*. As they accommodate such a possibility, they also function as a 'liminal space', a space for possible transformations.<sup>31</sup> Fischer-Lichte notes that the spatiality of performative space "results not just from the specific spatial uses of the actors but also from the particular atmospheres these spaces exude."<sup>32</sup> Atmospheres, according to Boehme, represent the collective reality of the perceived and the perceiver. That is to say, it is the reality of the perceived as a sphere of its presence, and, at the same time, it is the reality of the perceiver, insofar that the perceiver experiences their own corporeality while experiencing the atmosphere.<sup>33</sup> Following Boehme's definition, Fischer-Lichte argues that through atmospheric space, spectators become aware of their own corporeality; the atmosphere penetrates the bodies and breaks down their limits.<sup>34</sup> Accordingly, she concludes that through this process, the performative space functions as a liminal space of transformation.<sup>35</sup> Spectators are not "positioned opposite to or outside the atmosphere; they are enclosed by and steeped in it."<sup>36</sup> Following Boehme, atmosphere is considered as a "sphere of presence," which is neither specifically located in a thing that radiates them nor pertains to a person who experiences them.<sup>37</sup> Atmosphere pertains to both of them,<sup>38</sup> that is to say, it lies in-between, as present.

However, I suggest that spheres of presence or the presentness of the spaces between does not only represent or result from atmospheric space, à la Boehme. In his text *Bildung vor Bildern*, Pazzini negotiates the concept of mood (*Stimmung*) in the context of educational processes.<sup>39</sup> As he notes, a mood can be brought along, found in a space, or, alternatively, it can emerge ad hoc, or be triggered.<sup>40</sup> Moods affect, and are infectious. They pertain neither to objects, or attached to things that causes them, nor to the bodies that radiate or perceive them. Moreover, a mood is not a representation of something; it is, nonetheless present as spatial and temporal.<sup>41</sup> Mood, Pazzini argues, exceeds the individual subjects, affects and encompasses multiple individuals, and sets something in motion.<sup>42</sup> Mood, in this sense, can be regarded as transformative; since it “arouses, and can be aroused. It captivates, it can carry one away, and can lead one up until the point of a lapse.”<sup>43</sup> The concept of mood, as vague as it may seem at first sight, captures the spheres of presence and the presentness of the spaces between. Mood, in my view, shapes the spaces in-between, and brings them forth as such. Through ‘mood,’ temporality and spatiality of the spaces between become present (for individuals). Moreover, in/with a ‘mood,’ individuals experience their own corporeality, spatiality, and temporality, since they experience themselves as present.

Presence emerges, is articulated and perceived through the body.<sup>44</sup> Fischer-Lichte notes in the context of performance that, presence does not refer to the appearance of something extraordinary; “instead, it marks the emergence of something very ordinary and develops it into an event.”<sup>45</sup> – One might add that this kind of emergence occurs in experience. – Similarly, with regard to the presence of bodies and that of events/performances, Waldenfels argues that a performance, an event, or any kind of happening which takes place brings forth its own temporality and spatiality.<sup>46</sup> Especially in the context of events he notes that every event in which the individuals are particularly involved takes place in an intermediate area.<sup>47</sup> – that is to say, in spaces between. – An intermediate area can further be understood as a betwixt and between space which emerges in experience as such. Moreover, Waldenfels argues that such spaces are, to a certain extent, ambiguous.<sup>48</sup> This kind

of ambiguity results from the condition that a stage/a space between can only be considered and brought forth as such, if the individuals perform, if the performance/event attracts attention and manages to transform the present bodies into spectators [or co-actors].<sup>49</sup>

Spaces between emerge as present. They pertain neither to particular individuals that may partially trigger or be involved in them, nor do they merely belong to the space itself.<sup>50</sup> This kind of presence results from the movements, interactions and, more generally, from diverse responses of the individuals, either semi-scripted or temporally structured ones as in the case of some performances, events or mediation offers, or rather spontaneous ones. If thought again in terms of Pazzini, spaces between also emerge as present in, through and out of a certain mood – while also establishing a certain mood and functioning as captivating and contagious (*ansteckend*). As a direct response to that what is happening, taking place, they can be triggered spontaneously, or come forth unexpectedly and spontaneously. In this regard, I will briefly discuss the concept of spontaneity – as developed in my doctoral research – as a responsive-transformative strategy (*Anlass*) for museums as spaces of learning, as spaces between.

### III Spontaneity

Interactions of individuals/spectators with each other, with the space, and with the event shape the spaces between. Such interactions can be the result of a certain mood or affect. Alternatively, they can also constitute a certain mood and thus bring forth a space between as present. Fischer-Lichte indicates that a performance/event only comes into being and claims its space through the performance/event itself; that is to say, through the interactions between the performers and spectators.<sup>51</sup> Resulting from this argument, she further concludes that “the act of receiving is a creative and transformative act.”<sup>52</sup> Fischer-Lichte’s ‘act of receiving’ is by no means a passive digesting. On the contrary, it relies heavily on individuals and therefore their capabilities of bringing forth the performance/event and its performative space as such. For the spaces be-

tween sketched out here, I would like to think Fischer-Lichte's creative and transformative act of receiving more in terms of a creative and transformative way of responding, and therefore renegotiate it in terms of responsiveness.

As Waldenfels argues, responsivity refers to the understanding that "all of our speech, action and feeling begins elsewhere, namely with our being struck, touched, affected or approached, and that we respond to this, whether we want or not."<sup>53</sup> Responsivity, he further concludes, needs to be differentiated from "the orientation of intentionality to sense as well as from the rule-directedness of communicativity."<sup>54</sup> More generally, he defines the responsivity as the main character of human behavior,<sup>55</sup> which calls for a specific form of response.<sup>56</sup> Such a form is not reduced to a linguistic response, rather, it is a bodily response in corporeal responsory and shapes the entire behavior of individuals to themselves, to others, and more generally, to the world as such.<sup>57</sup> In addition, Waldenfels differentiates between two types of responses; productive/creative and reproductive responses.<sup>58</sup> By creative response he indicates that the responder never gives a pre-existing response to the stimuli, rather, a response first develops in the process of responding.<sup>59</sup> One might add that such a response shapes/ and emerges in spaces between. Waldenfels argues that "the *by-what* of being touched [gets] transformed into the *to-what* of responding,"<sup>60</sup> – and this with a genuine shift in time – and therefore points at the transformative character of the responding process. Waldenfels furthermore defines 'responding' as a performative act<sup>61</sup> and therefore distinguishes it from the content of the response itself. Responsivity, he argues, is directly connected with a request which comes from the Other/ Somewhere else.<sup>62</sup> Such a request can take the form of a demand, appeal, claim, excitement or a challenge;<sup>63</sup> alternatively, it can also appear as a disruption or an interference.<sup>64</sup> Such a request is, he argues, nothing but that to-what we respond when we say something and act.<sup>65</sup> Consequently, he then defines 'a response' as our touching upon that which we feel affected, struck by or appeals to us.<sup>66</sup>

More crucially, Waldenfels lays emphasis on the inevitability of responding when faced with a request/demand; and argues that, for in-

stance, a conscious not-responding defines actually a form of response; a looking-away is a form of looking; and similarly, a remaining silent is at the end a form of speech.<sup>67</sup> This kind of inevitability is, in the end, what a performance/ an event relies on. A not-responding is a direct and inevitable response to that which occurs, takes place. Moreover, a not-responding can also be interpreted as a creative and possibly transformative way of responding, since it becomes a part of what is happening, taking place, and therefore, shapes it as well.

As mentioned above, a disruption, an interference, or, alternatively, a direct irritation can function as a request by appearing as a rupture in the everyday course of events which then imposes a response on the responder/spectator. Such a rupture can occur either spontaneously, as something that falls out of the ordinary, or can be brought about by someone as a spontaneous request to act, perform or engage. Such spontaneous requests can be experienced as inviting, playful, or alternatively, repelling, provoking, and disturbing. Moreover, they can also set an uncertain and ambiguous mood in motion, and thus attract curiosity and therefore elicit a collaborative behavior, or, alternatively, result in a sort of resistance – which is a response nonetheless. Whatever the ways in which such requests are experienced, they trigger, ultimately set something in motion and even act as an event by themselves.

For bringing forth the spaces between, spontaneous requests/demands function as a sort of rupture – which falls out of the ordinary – and as such, they ultimately provoke an action, a response, either a linguistic or a bodily one. They therefore trigger a process, an event-like situation which is only constituted through the responses of the individuals/spectators. Spontaneous requests to act or engage in various settings can thus be understood as responsive – even performative – as they are directed towards a response. They can also be thought of as transformative; not only because the responding is a performative act, as Waldenfels states, but because of the possibility of undergoing a (temporary) transformation during the process of responding – which is a liminal state. Spontaneity as one of the basic forms of human behavior can thus be understood as a responsive-transformative strategy that

brings forth the spaces between. Where the real and imagined melt into each other.

## IV Conclusion

Now, after this brief discussion on the conditions of emergence, possible triggers, presence, and the presentness of the spaces between, I would like to take a step back and pose the same bundle of questions that initiated this entire negotiation. “When considered in terms of museum(s), where does ‘learning’ really take place? In a workshop or a seminar room during a mediation offer, or in the halls and galleries of a museum with a guided tour? Or, simply, in none of these spaces?” *Learning as an event* is the presupposition of this article. And as such, it is a temporally extended process, one that brings forth and claims its own space as a responsive event. Moreover, learning is eventful and event-like. As indicated in the introduction, learning signifies a playful interlinking, a constant movement at the intersection of deviation, escalation, rejection, and challenge. Always from one event into another. Or as Meyer-Drawe puts it, learning is an awakening, a beginning without a certain completion.

If thought about in the context of museums, the structure and the variety of settings differ from a classical teaching setting at an academy. However, as indicated above, such a structure can be compared to a container, which is given and its spatiality does not rely on the co-presence of the bodies. Spaces between as the spaces of *events and spaces of learning*, on the other hand, can only be brought forth through the co-presence of bodies, through actions, interactions, and responses. *Spontaneity*, for instance, can be used not only to create an event, but as an event, an occasion (*Anlass*) by itself. Such an event can take the form of a direct appeal for spectators to engage with a certain work of art, or to collaborate with each other. Only during such an engagement or encounter between a spectator and a work of art, or during the interaction of multiple spectators a space between can be brought forth as present. If thought again with Meyer-Drawe, such an ‘awakening’ can also be thought in terms of

an encounter with a work of art, whereas the artwork functions as an impulse which comes from somewhere else, attracts attention and therefore requires a response. Only in the process of responding does such a space between emerge as present.

Through this brief and experimental discussion, the article compares learning to an event in order to negotiate a space for it. With the assumption of learning as an event, it argues that it takes place in *spaces between* – a performative space where the real and imagined melt into each other. Such a space is transitory, and constantly mutates, as is the case with performances and events. Spaces between, I would like to argue, ultimately rely on the inevitability of responding and a request which comes from the other, somewhere else. Moreover, such spaces are responsive and transformative. Similarly, in terms of Fischer-Lichte, also liminal. Spaces between as sketched out here emerge in experience as present and do not represent a physical construct. They emerge not only as a result of the experimentation with given spaces – as conceptualized for performances – but also through a range of experimental approaches in general. For instance, through the introduced concept of spontaneous request to act, perform, or engage in the context of the museum. Such requests, as explicated, can define something which attracts attention, or induce a sort of provocation, alternatively, can be a direct appeal for an engagement, be it with a work of art or with the other spectators. At this point, I also would like to emphasize that my sketch of learning, *Bildung*, and spaces between are also equally applicable concepts to academical settings where the learning processes can also take place spontaneously, eventfully and unexpectedly. However, within the current discourse of *Bildung* and skills-based learning-and-teaching, as well as in the context of related theoretical positions, such concepts are mostly neglected, or barely considered.

Spaces between can further be situated in the context of transformative educational processes. The main premise of the theory, as Koller argues, marks the higher-level learning as educational processes (*Bildung*) and indicates that individuals in such processes not only acquire new knowledge, but they may undergo a certain transformation.<sup>68</sup> Behavioral changes (*Denk-, Handlungsdispositionen*), as Koller argues, can

be consequences of such transformations in relation to the self, and the world.<sup>69</sup> Inquiring about the possible cause(s) for transformative educational processes, Koller concludes that the impulse always comes from somewhere else, therefore indicates that educational processes are always *responsive events*, and do not refer to the unfolding of the inner potential of individuals.<sup>70</sup> Following this argument, and on the basis of the concept sketched out above, I suggest that such responsive events along with the suggested transformations regarding the shifts in terms of perception and behavior take place in spaces between.



## Notes

- 1 Noë, Alva: *Varieties of Presence*, 2012, p. 77.
- 2 Ibid., p. 78.
- 3 Waldenfels, Bernhard: *Phänomenologie der Aufmerksamkeit*, 2019/2004, p. 47.
- 4 Ibid., p. 47.
- 5 With my sketch of “learning” I lean on the phenomenological, educational-theoretical positions in which the concept of learning and/or *Bildung* is always thought as an open-ended process with an event character. See: Käte Meyer-Drawe, Bernhard Waldenfels.
- 6 Meyer-Drawe, Käte: *Lernen als Erfahrung*, Zeitschrift für Erziehungswissenschaft, Vol. 6, issue 4/2003, p. 508.
- 7 Ibid., p. 506.
- 8 Meyer-Drawe, Käte: *Zur Erfahrung des Lernens. Eine Phänomenologische Skizze*, Santalca, Filosofija, 2010 18(3), p. 7.
- 9 Ibid., p. 7.
- 10 Ibid., p. 7.
- 11 Ibid., p. 8.
- 12 Fischer-Lichte, Erika: *The Transformative Power of Performances. A new aesthetics*, 2008, p. 114.
- 13 Ibid., p. 107.
- 14 Ibid., p. 107.
- 15 Ibid., p. 107.
- 16 Ibid., p. 107.
- 17 Merleau-Ponty, Maurice: *Phänomenologie der Wahrnehmung*, 1966, p. 125.
- 18 Ibid., p. 125–126.
- 19 Ibid., p. 128.
- 20 Fischer-Lichte, Erika: *The Transformative Power of Performances. A new aesthetics*, 2008, p. 107.
- 21 Löw, Martina: *Raumsoziologie*, 2012/2001, p. 26.
- 22 Ibid., p. 26–27.
- 23 Waldenfels, Bernhard: *Die Bühne als Brennpunkt des Geschehens*, 2016, p. 18.

- 24 Ibid., p. 18.
- 25 Ibid., p. 18.
- 26 Fischer-Lichte, Erika: *The Transformative Power of Performances. A new aesthetics*, 2008, p. 107.
- 27 Ibid., p. 114.
- 28 Ibid., p. 110.
- 29 Ibid., p. 114.
- 30 Löw, Martina: *Raumsoziologie*, 2012/2001, p. 27–28.
- 31 Fischer-Lichte, Erika: *The Transformative Power of Performances. A new aesthetics*, 2008, p. 119–120.
- 32 Ibid., p. 114.
- 33 Böhme, Gernot: *Atmosphäre. Essays zur neuen Ästhetik*, 2013 (7th edition), p. 21.
- 34 Fischer-Lichte, Erika: *The Transformative Power of Performances. A new aesthetics*, 2008, p. 119–120.
- 35 Ibid.
- 36 Ibid., p. 116.
- 37 Ibid., p. 115.
- 38 Ibid.
- 39 Pazzini, Karl-Josef: *Bildung vor Bildern. Kunst – Pädagogik – Psychoanalyse*. 2015, p. 317.
- 40 Ibid., p. 323.
- 41 Ibid., p. 318–319.
- 42 Ibid., p. 319.
- 43 Ibid., p. 320.
- 44 Fischer-Lichte, Erika: *The Transformative Power of Performances. A new aesthetics*, 2008, p. 98.
- 45 Ibid., p. 99.
- 46 Waldenfels, Bernhard: *Phänomenologie der Aufmerksamkeit*, 2019/2004, p. 47.
- 47 Ibid., p. 41–42.
- 48 Waldenfels, Bernhard: *Die Bühne als Brennpunkt des Geschehens*, in: Norbert Otto Eke, Ulrike Haß, Irina Kaldrack (Hg.): *Bühne. Raum-bildende Prozesse im Theater*. Paderborn: Fink 2016 (Schriftenreihe des Graduiertenkollegs “Automatismen”), p. 13–26, here p. 20.

- 49 Ibid., p. 20.
- 50 Waldenfels, Bernhard: *Phänomenologie der Aufmerksamkeit*, 2019/2004, p. 42
- 51 Fischer-Lichte, Erika: "Introduction: Transformative aesthetics – reflections on the metamorphic power of art", in: Erika Fischer-Lichte & Benjamin Wihstutz, eds.: *Transformative Aesthetics*, 2018, p. 13.
- 52 Ibid., p. 13.
- 53 Waldenfels, Bernhard: "Metamorphoses of experience in the picture", in: Erika Fischer-Lichte & Benjamin Wihstutz, eds.: *Transformative Aesthetics*, 2018, p. 71.
- 54 Ibid., p. 71.
- 55 Waldenfels, Bernhard: *Antwortregister*, 2016/2007, p. 327.
- 56 Waldenfels, Bernhard: "Antwort auf das Fremde. Grundzüge einer responsiven Phänomenologie", in: Bernhard Waldenfels & Iris Därmann, eds.: *Der Anspruch des Anderen. Perspektiven phänomenologischer Ethik*, 1998, p. 45.
- 57 Waldenfels, Bernhard: *Erfahrung, die zur Sprache drängt*, 2019, p. 255.
- 58 "Produktive und reproduktive Form des Antwortens", Bernhard Waldenfels, *Topographie des Fremden*, 2020/1997, p. 53.
- 59 Waldenfels, Bernhard: "Metamorphoses of experience in the picture", in: Erika Fischer-Lichte & Benjamin Wihstutz, eds.: *Transformative Aesthetics*, 2018, p. 71.
- 60 Ibid., p. 71.
- 61 Ibid., p. 71.
- 62 Waldenfels, Bernhard: *Das leibliche Selbst*, 2018/2000, p. 368.
- 63 Waldenfels, Bernhard: *Antwortregister*, 2016/2007, p. 243–244.
- 64 Waldenfels, Bernhard: *Erfahrung, die zur Sprache drängt*, 2019, p. 113–114.
- 65 Waldenfels, Bernhard: *Das leibliche Selbst*, 2000, p. 368.
- 66 Waldenfels, Bernhard: *Erfahrung, die zur Sprache drängt*, 2019, p. 75.
- 67 Waldenfels, Bernhard: *Topographie des Fremden*, 2020/1997, p. 52, & Waldenfels: *Antwort auf das Fremde. Grundzüge einer responsiven Phänomenologie*, 1998, p. 46.

- 68 Koller, Hans-Christoph: "Grundzüge einer Theorie transformatorischer Bildungsprozesse", in: Andrea Liesner and Ingrid Lohman, eds.: *Gesellschaftliche Bedingungen von Bildung und Erziehung, Eine Einführung*. Stuttgart 2010, p. 290.
- 69 Ibid., p. 290.
- 70 Koller, Hans-Christoph: "Probleme einer Theorie transformatorischer Bildungsprozesse", in: Hans-Christoph Koller, Winfried Marotzki and Olaf Sanders, eds.: *Bildungsprozesse und Fremdheitserfahrung. Beiträge zu einer Theorie transformatorischer Bildungsprozesse*, Bielefeld, transcript, 2007, p.71.
